# Supplementary material for: A PDGFRβ-PI3K signaling axis mediates periosteal cell activation during fracture healing
Source: PubMed Central journal article supplement (PMC6821073; doi:10.1371/journal.pone.0223846), 2019-10-30

**Fig. 2A**

p-Akt substrates

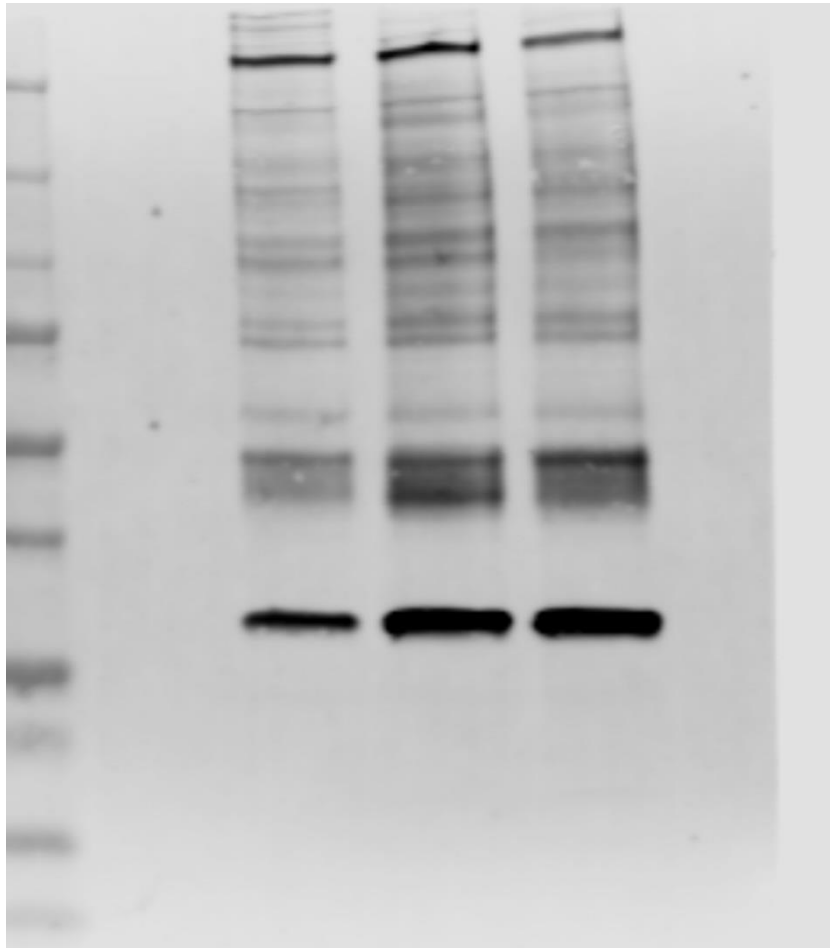

$\beta$ -actin

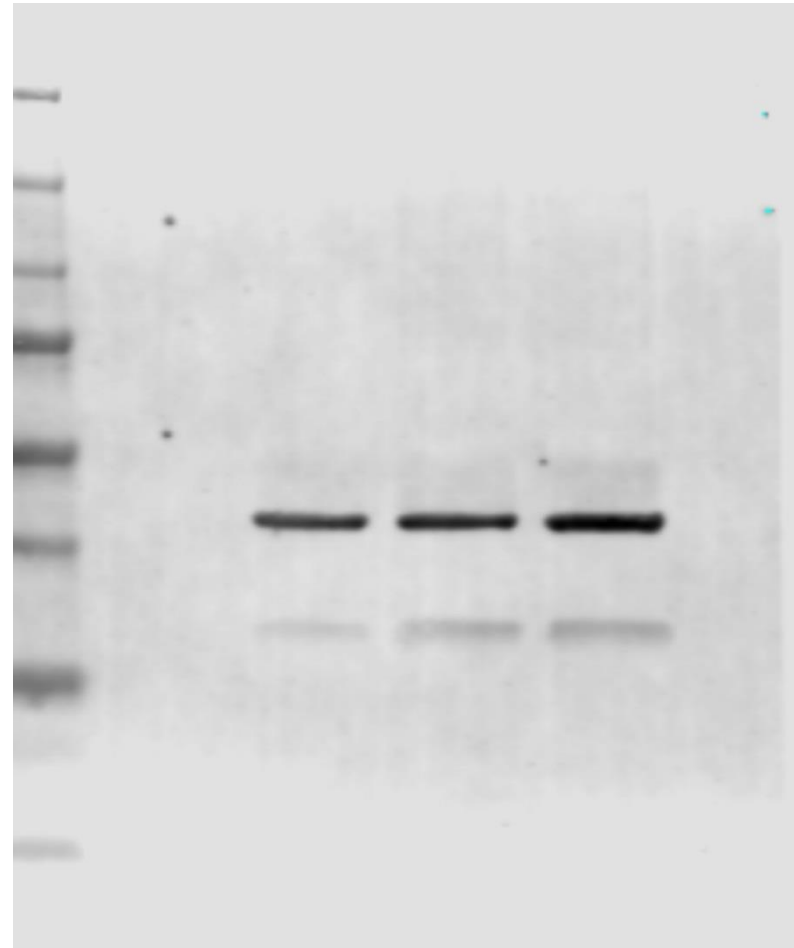

**Fig. 3A**

p-Tyr-PDGFR $\beta$

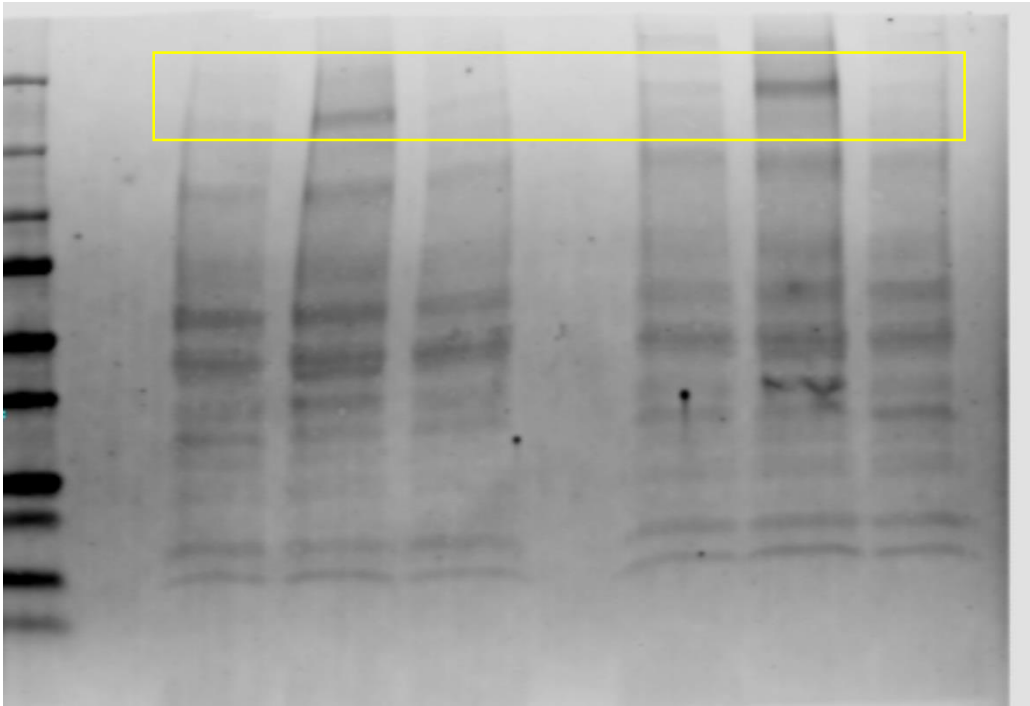

PDGFR $\beta$

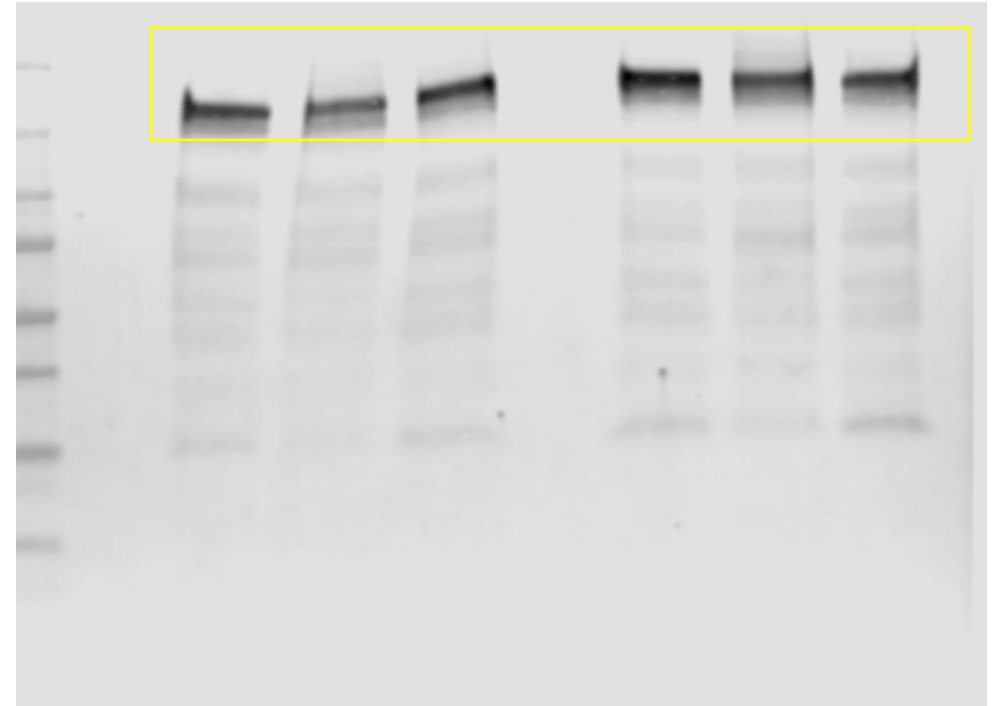

**Fig. 3B (top)**

p-Akt (Ser473)

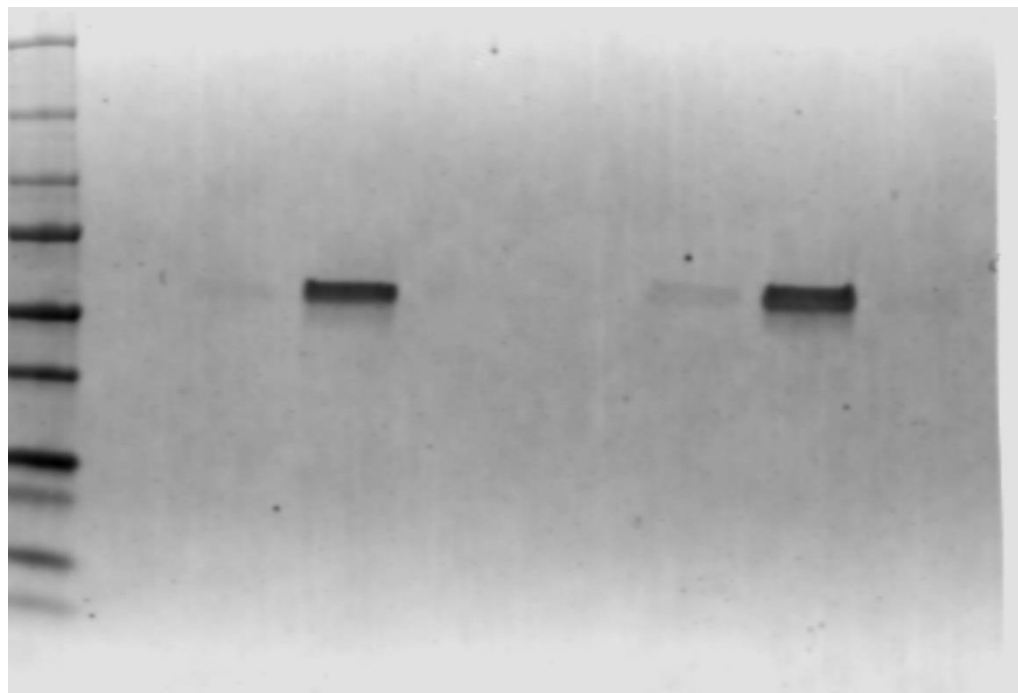

Akt

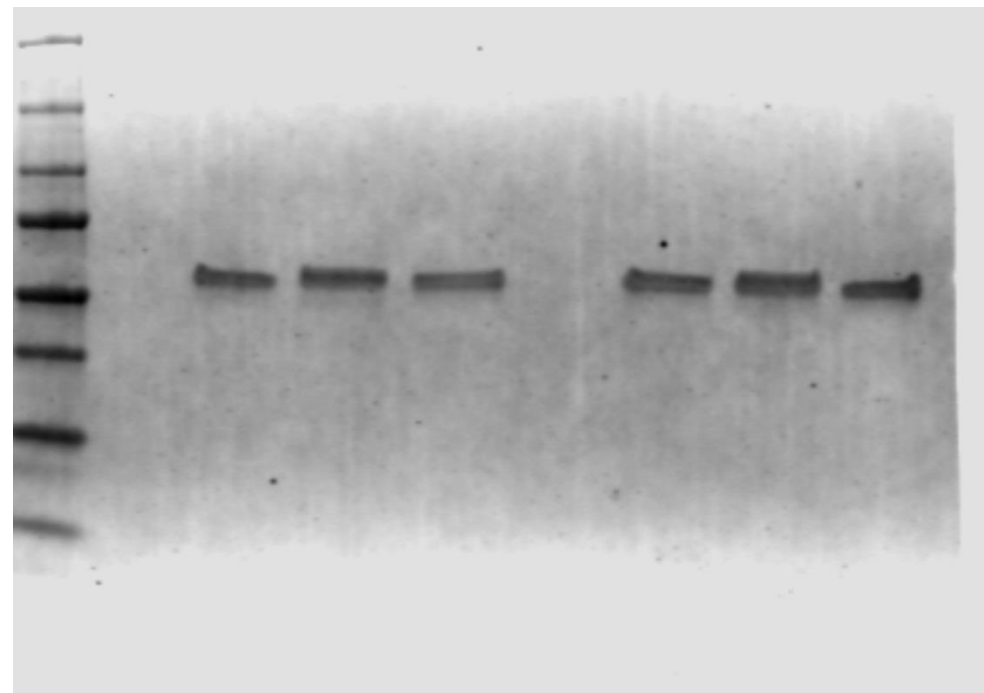

**Fig. 3B (bottom)**

p-Akt substrates

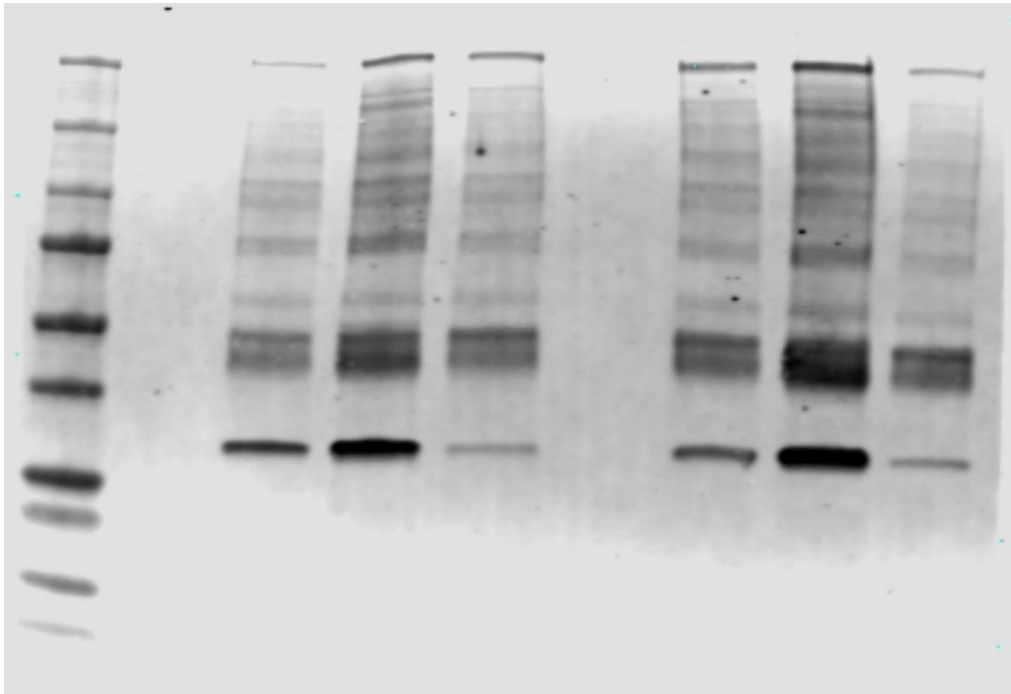

$\beta$ -actin

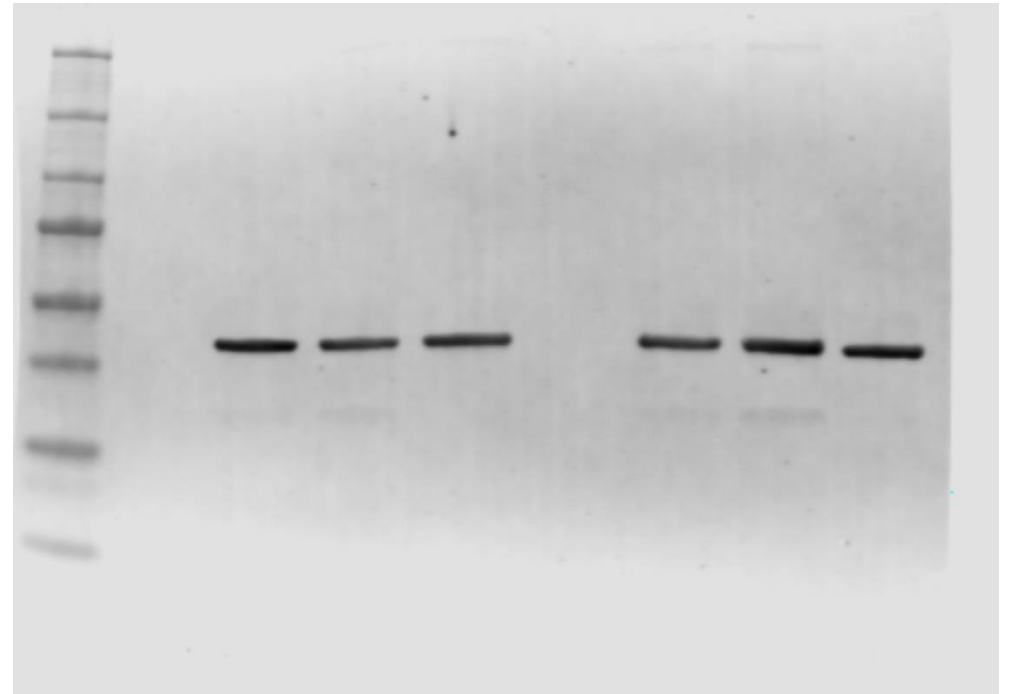

Supplement: pone.0223846.s004.pdf [file pone.0223846.s004.pdf]
