# Supplementary material for: A PDGFRβ-PI3K signaling axis mediates periosteal cell activation during fracture healing
Source: PubMed Central journal article supplement (PMC6821073; doi:10.1371/journal.pone.0223846), 2019-10-30
Supplement: pone.0223846.s005.pdf [file pone.0223846.s005.pdf]

Minimal Data Set

**Fig. 4B**

**ALP+ Periosteal Thickness\***

| Cre- | Cre+  |
|------|-------|
| 7.98 | 9.28  |
| 9.82 | 9.99  |
| 8.45 | 10.15 |

\* ALP+ periosteal thickness was measured and quantified manually using ImageJ software. ALP+ periosteal thickness are presented as averages of four sites (1500  $\mu\text{m}$  from fracture site) in each sample, in 3 samples total.

**Fig. 4D**

**Cambium Thickness\***

| Cre-  | Cre+  |
|-------|-------|
| 49.65 | 24.25 |
| 50.67 | 34.9  |
| 48.29 | 34.59 |
|       | 23.6  |

\*Cambium thickness was measured and quantified manually using ImageJ software. ALP+ periosteal thickness are presented as averages of four sites (1500  $\mu\text{m}$  from fracture site) in each sample, in 3-4 samples total.

**ALP+ Periosteal Thickness\***

| Cre-  | Cre+  |
|-------|-------|
| 49.65 | 24.25 |
| 50.67 | 34.9  |
| 48.29 | 34.59 |
|       | 23.6  |

\* ALP+ periosteal thickness was measured and quantified manually using ImageJ software. ALP+ periosteal thickness are presented as averages of four sites (1500  $\mu\text{m}$  from fracture site) in each sample, in 3-4 samples total.

**Fig. 4E**

**PDGFR Deletion**

| Cre- | Cre+ |
|------|------|
| 41.5 | 19.3 |
| 88   | 17.7 |
| 65   | 27.4 |

**Fig. 5A**

**Proliferating Cells (no treatment)**

| AdGFP | AdCre |
|-------|-------|
| 5.05  | 4.35  |
| 4.85  | 4.39  |
| 4.72  | 4.59  |

**Proliferating Cells (+PDGF-BB)**

| AdGFP | AdCre |
|-------|-------|
| 11.6  | 10.1  |
| 11.3  | 10.4  |
| 11.4  | 10.1  |

**Fig. 6A**

**CD140b+**

| Cre- | Cre+ |
|------|------|
| 0.45 | 0.23 |
| 2.69 | 0.21 |
| 1.25 | 0.25 |
| 1.46 | 0.23 |

**Edu+**

| Cre-  | Cre+ |
|-------|------|
| 11.2  | 8.39 |
| 13.9  | 6.22 |
| 12.55 | 3.65 |

**Fig. 6B****CD140b+**

| Cre- | Cre+ |
|------|------|
| 0.85 | 0.47 |
| 0.45 | 0.52 |
| 0.42 | 0.45 |
| 0.57 | 0.48 |

**EdU+**

| Cre- | Cre+ |
|------|------|
| 19.7 | 12.3 |
| 14.3 | 12.4 |
| 23.8 | 11.3 |
